# Supplementary material
Source: PubMed Central journal article supplement (PMC6262508)

Table S1.

|              |             | All structures | LOBULES      | DUCTS        | Lobules    | Ducts      | Lobules | Ducts   | Lobules   | Ducts     |
|--------------|-------------|----------------|--------------|--------------|------------|------------|---------|---------|-----------|-----------|
| Biopsy No.   | Age (years) | % contiguous   | % contiguous | % contiguous | contiguous | contiguous | patched | patched | scattered | scattered |
| 1            | 13          | 100            | 100          | 100          | 7          | 5          | 0       | 0       | 0         | 0         |
| 2            | 17          | 100            | 100          | 100          | 18         | 6          | 0       | 0       | 0         | 0         |
| 3            | 17          | 100            | 100          | 100          | 6          | 6          | 0       | 0       | 0         | 0         |
| 4            | 18          | 94,7           | 88,9         | 100          | 8          | 10         | 1       | 0       | 0         | 0         |
| 5            | 18          | 100            | 100          | 100          | 13         | 5          | 0       | 0       | 0         | 0         |
| 6            | 19          | 100            | 100          | 100          | 13         | 1          | 0       | 0       | 0         | 0         |
| 7            | 19          | 91,7           | 88,9         | 100          | 8          | 3          | 1       | 0       | 0         | 0         |
| 8            | 19          | 100            | 100          | 100          | 7          | 3          | 0       | 0       | 0         | 0         |
| 9            | 19          | 73,9           | 60           | 100          | 9          | 8          | 6       | 0       | 0         | 0         |
| 10           | 20          | 100            | 100          | 100          | 19         | 10         | 0       | 0       | 0         | 0         |
| 11           | 20          | 100            | 100          | 100          | 14         | 4          | 0       | 0       | 0         | 0         |
| 12           | 20          | 97,2           | 100          | 91,7         | 24         | 11         | 0       | 1       | 0         | 0         |
| 13           | 20          | 41,7           | 28,6         | 60           | 2          | 3          | 4       | 2       | 1         | 0         |
| Average <21: |             | 92.2%          | 89.7%        | 96.3%        |            |            |         |         |           |           |
| 14           | 22          | 30,8           | 12,5         | 60           | 1          | 3          | 6       | 2       | 1         | 0         |
| 15           | 22          | 50             | 12,5         | 100          | 1          | 6          | 3       | 0       | 4         | 0         |
| 16           | 23          | 35,3           | 20           | 57,1         | 2          | 4          | 6       | 3       | 2         | 0         |
| 17           | 23          | 100            | 100          | 100          | 13         | 7          | 0       | 0       | 0         | 0         |
| 18           | 24          | 100            | 100          | 100          | 16         | 3          | 0       | 0       | 0         | 0         |
| 19           | 24          | 60             | 25           | 83,3         | 1          | 5          | 3       | 1       | 0         | 0         |
| 20           | 27          | 89,5           | 87,5         | 100          | 14         | 3          | 2       | 0       | 0         | 0         |
| 21           | 27          | 27,3           | 0            | 60           | 0          | 3          | 2       | 2       | 4         | 0         |
| 22           | 28          | 66,7           | 59,1         | 100          | 13         | 5          | 9       | 0       | 0         | 0         |
| 23           | 28          | 50             | 25           | 83,3         | 2          | 5          | 5       | 1       | 1         | 0         |
| 24           | 29          | 63,6           | 56           | 87,5         | 14         | 7          | 5       | 1       | 6         | 0         |
| 25           | 29          | 61,5           | 57,1         | 66,7         | 8          | 8          | 5       | 3       | 1         | 1         |
| 26           | 32          | 88,6           | 95,5         | 76,9         | 21         | 10         | 1       | 3       | 0         | 0         |
| 27           | 32          | 79,2           | 84,2         | 60           | 16         | 3          | 1       | 2       | 2         | 0         |
| 28           | 33          | 68,4           | 69,2         | 66,7         | 9          | 4          | 2       | 1       | 2         | 1         |
| 29           | 34          | 87             | 80           | 100          | 12         | 8          | 3       | 0       | 0         | 0         |
| 30           | 34          | 77,8           | 69,2         | 100          | 9          | 5          | 3       | 0       | 1         | 0         |
| 31           | 36          | 91,5           | 91,9         | 90           | 79         | 18         | 5       | 1       | 2         | 1         |
| 32           | 39          | 100            | 100          | 100          | 10         | 8          | 0       | 0       | 0         | 0         |
| 33           | 39          | 80             | 72,7         | 100          | 8          | 4          | 3       | 0       | 0         | 0         |
| 34           | 40          | 57,1           | 30           | 81,8         | 3          | 9          | 6       | 2       | 1         | 0         |
| 35           | 41          | 71,4           | 70           | 75           | 7          | 3          | 3       | 1       | 0         | 0         |
| 36           | 42          | 92,9           | 91,7         | 100          | 11         | 2          | 1       | 0       | 0         | 0         |
| 37           | 43          | 56,3           | 60           | 50           | 6          | 3          | 3       | 3       | 1         | 0         |
| 38           | 43          | 53,8           | 37,5         | 80           | 3          | 4          | 5       | 0       | 0         | 1         |
| 39           | 44          | 73,1           | 69,6         | 100          | 16         | 3          | 7       | 0       | 0         | 0         |
| 40           | 44          | 60             | 40           | 100          | 4          | 5          | 6       | 0       | 0         | 0         |
| 41           | 45          | 100            | 100          | 100          | 6          | 10         | 0       | 0       | 0         | 0         |
| 42           | 45          | 62,5           | 50           | 83,3         | 5          | 5          | 5       | 1       | 0         | 0         |

|                           |    |                |               |               |             |                  |            |             |    |    |    |
|---------------------------|----|----------------|---------------|---------------|-------------|------------------|------------|-------------|----|----|----|
| 43                        | 45 | 89,7           | 90            | 88.9          | 18          | 8                | 1          | 1           | 1  | 0  |    |
| 44                        | 45 | 73,3           | 66.7          | 100           | 8           | 3                | 2          | 0           | 2  | 0  |    |
| 45                        | 45 | 53,8           | 70            | 0             | 7           | 0                | 2          | 3           | 1  | 0  |    |
| 46                        | 45 | 54,5           | 28.6          | 100           | 2           | 4                | 5          | 0           | 0  | 0  |    |
| 47                        | 46 | 83,7           | 83.7          | 83.3          | 36          | 5                | 5          | 1           | 2  | 0  |    |
| 48                        | 46 | 60             | 54.5          | 75            | 6           | 3                | 3          | 1           | 2  | 0  |    |
| 49                        | 46 | 68,6           | 63.8          | 91.7          | 37          | 11               | 11         | 1           | 10 | 0  |    |
| 50                        | 49 | 41,2           | 53.8          | 0             | 7           | 0                | 2          | 3           | 4  | 1  |    |
| 51                        | 51 | 84,6           | 66.7          | 90            | 2           | 9                | 0          | 1           | 1  | 0  |    |
| 52                        | 54 | 93,8           | 90.9          | 100           | 10          | 5                | 0          | 0           | 1  | 0  |    |
| 53                        | 56 | 30             | 41.7          | 12.5          | 5           | 1                | 2          | 2           | 5  | 5  |    |
| 54                        | 57 | 40             | 25            | 100           | 3           | 3                | 7          | 0           | 2  | 0  |    |
| 55                        | 59 | 100            | 100           | 100           | 10          | 4                | 0          | 0           | 0  | 0  |    |
| 56                        | 59 | 30             | 7.7           | 71.4          | 1           | 5                | 2          | 2           | 10 | 0  |    |
| 57                        | 75 | 85,7           | 78.6          | 100           | 11          | 7                | 3          | 0           | 0  | 0  |    |
| Average >21:              |    | 68.7%          | 61.1%         | 81.2%         |             |                  |            |             |    |    |    |
|                           |    |                |               |               | Total:      | 621              | 306        | 157         | 45 | 70 | 10 |
|                           |    |                |               |               | All:        | 1209             |            |             |    |    |    |
|                           |    |                |               |               | Contiguous: | 927/1209 (76.7%) |            |             |    |    |    |
|                           |    |                |               |               | Lobules:    | 848              | Contiguous | 621 (73.2%) |    |    |    |
|                           |    |                |               |               | Ducts:      | 361              | Contiguous | 306 (84.8%) |    |    |    |
|                           |    |                |               |               |             |                  |            |             |    |    |    |
|                           |    |                |               |               |             |                  |            |             |    |    |    |
|                           |    | All structures | Lobules       | Ducts         |             |                  |            |             |    |    |    |
| ≥80% contiguous <21 years |    | 11/13 (84.6%)  | 11/13 (84.6%) | 12/13 (92.3%) |             |                  |            |             |    |    |    |
| ≥80% contiguous >21 years |    | 16/44 (36.4%)  | 14/44 (31.8%) | 30/44 (68%)   |             |                  |            |             |    |    |    |

## Supplemental Legends

**Figure S1.** Comparison of two monoclonal antibodies (104D2 and K45) against CD117 reveal an identical staining pattern. Bar, 50  $\mu\text{m}$ .

**Figure S2.** Distribution of contiguous structures in ducts and lobules from 57 donors correlated to age. (A) FACS-diagrams showing the gating strategy for analysis of the frequency of CD117-positive cells within the luminal compartment of normal breast tissue. (B) Diagrams showing the percentage of contiguous structures in lobules and ducts according to age. Spearman correlation test indicates an age-related reduction in contiguous structures for lobules.  $\rho=-0.31$ ,  $p < 0.05$ .

**Figure S3.** (A) Serial sections stained by immunoperoxidase from an area with widespread expression of GATA3. A neighboring section shows a reaction intensity for ER $\alpha$  ranging from strong to negative. Accompanying serial sections were also stained for CD117 and CAM5.2. Bar, 50 $\mu\text{m}$ . (B) Serial sections from a lactating breast gland stained for CD117 or CAM5.2. Bar, 50 $\mu\text{m}$

**Figure S4.** Serial sections of aberrant structures from three normal-derived breast glands stained for CD117, Ki67 and CAM5.2 by immunoperoxidase. Bar, 50 $\mu\text{m}$ .

104D2

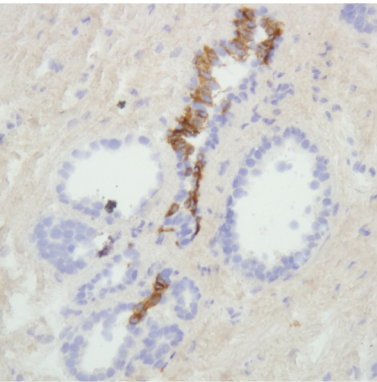

K45

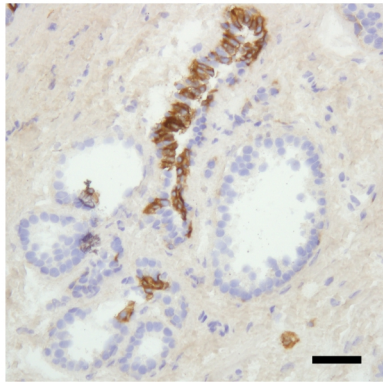



**A**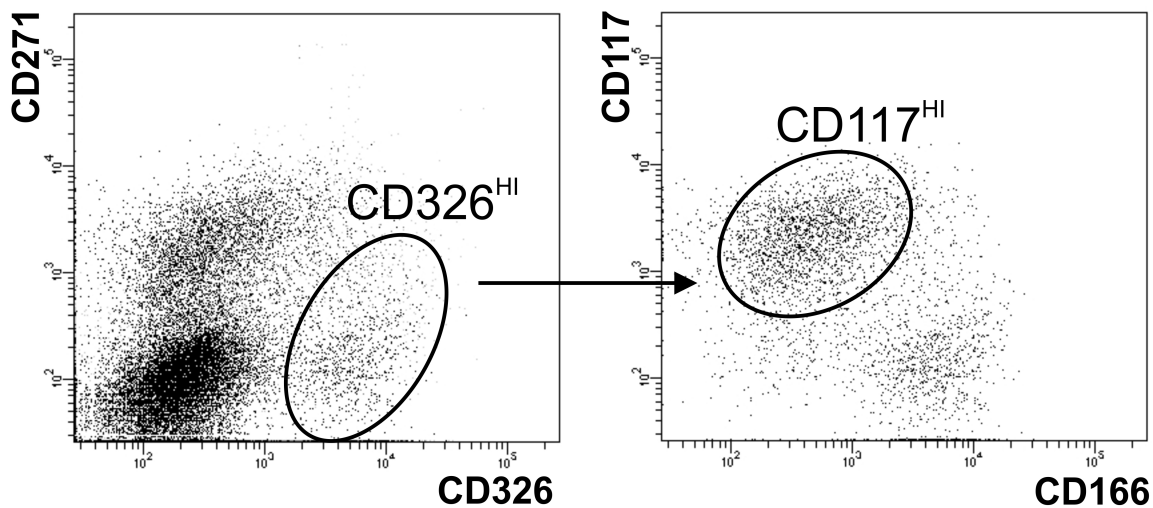**B**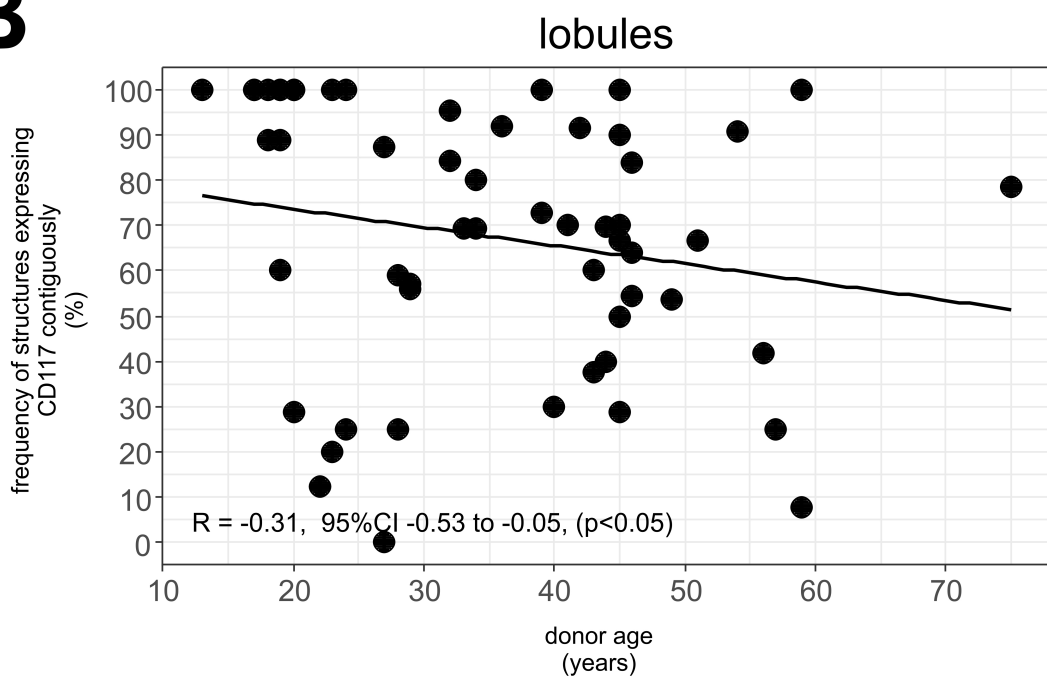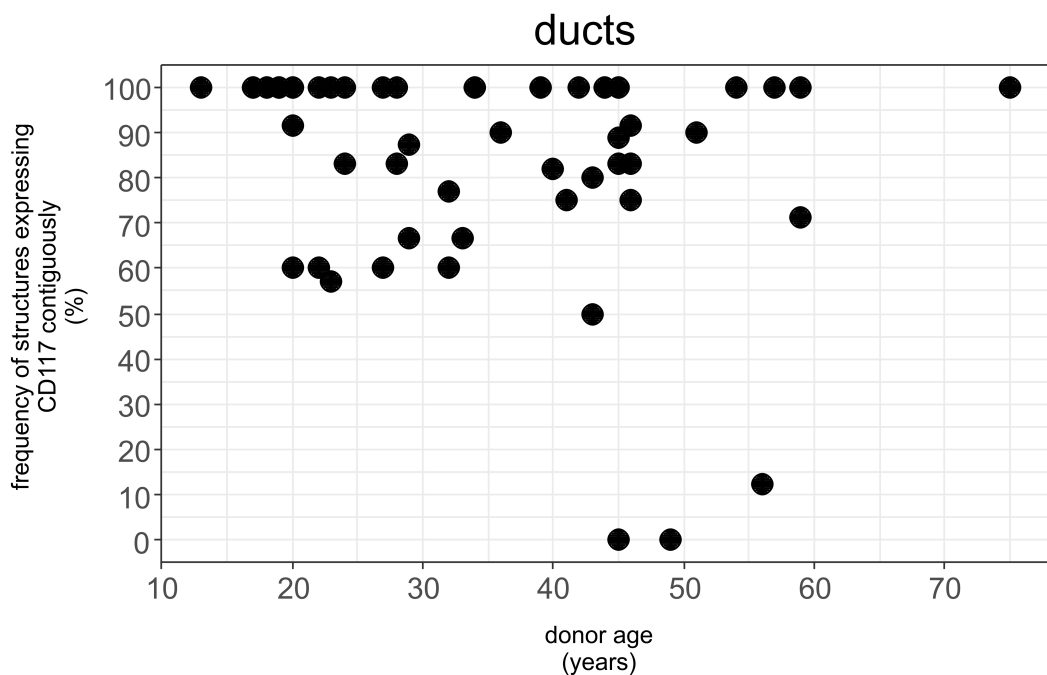

**A**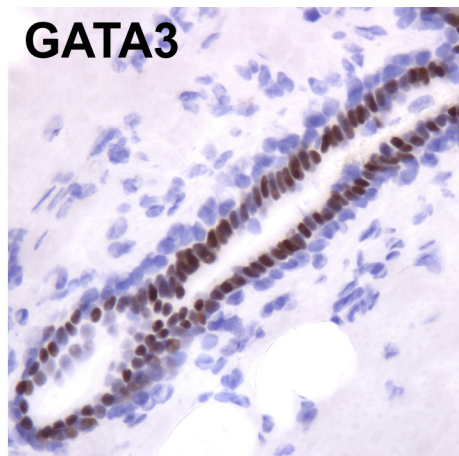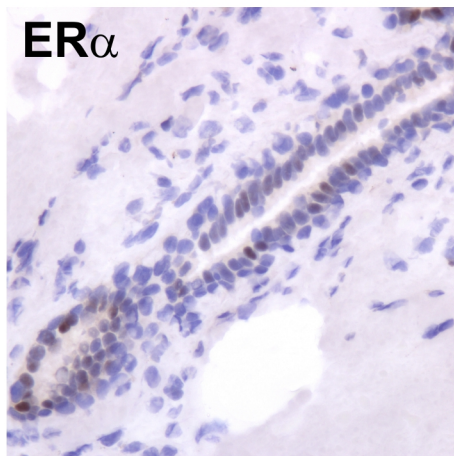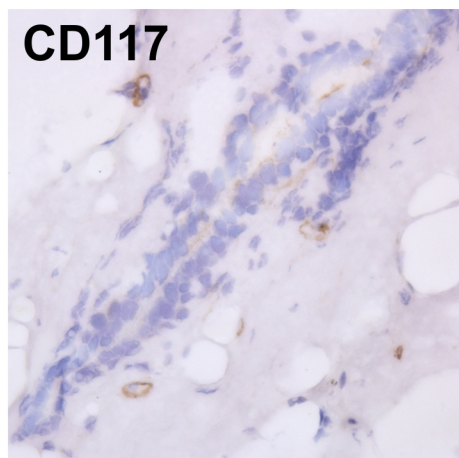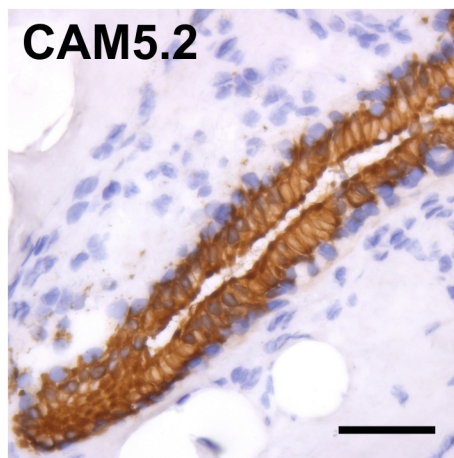**B**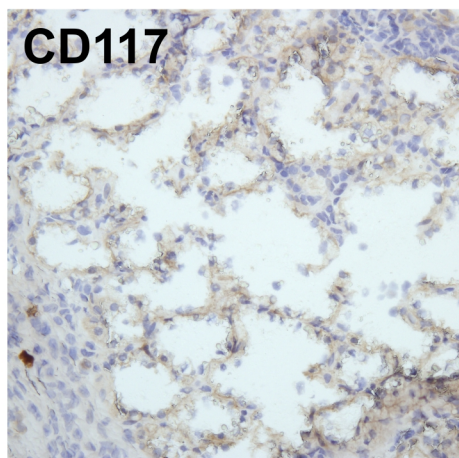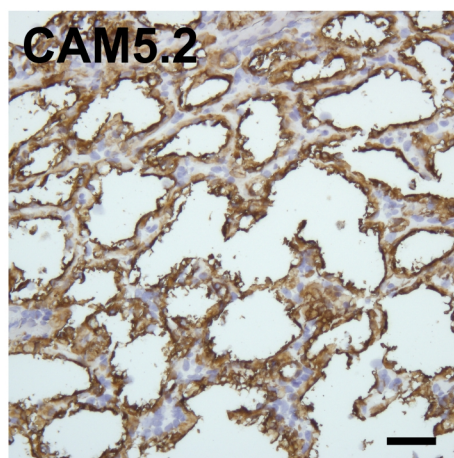



CD117

Ki67

CAM5.2

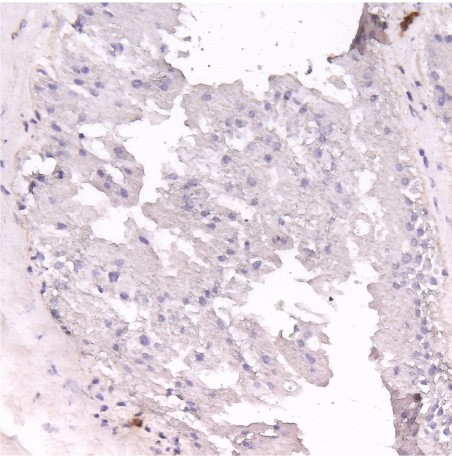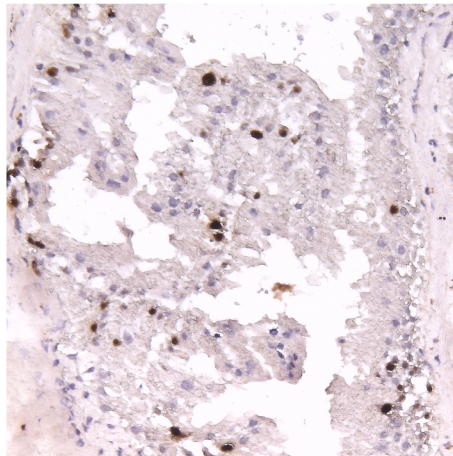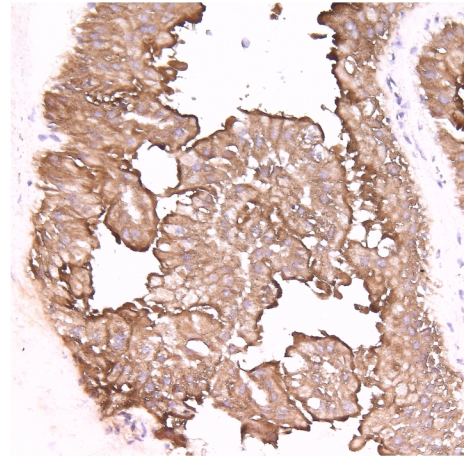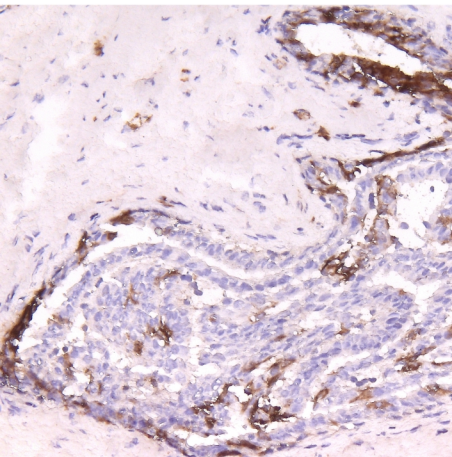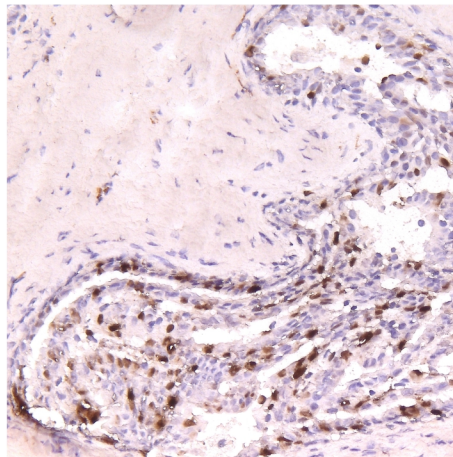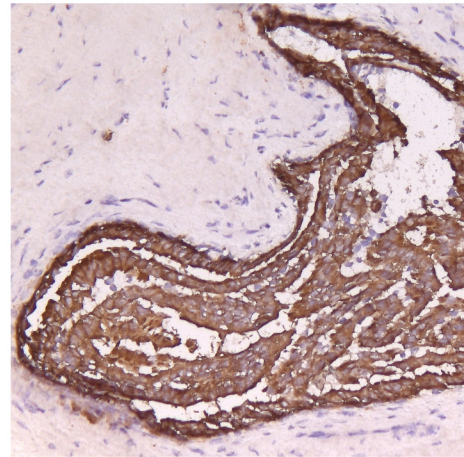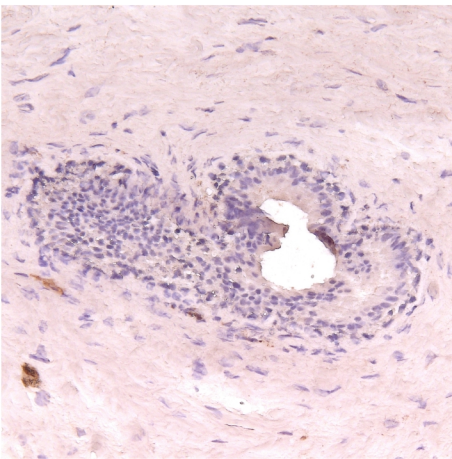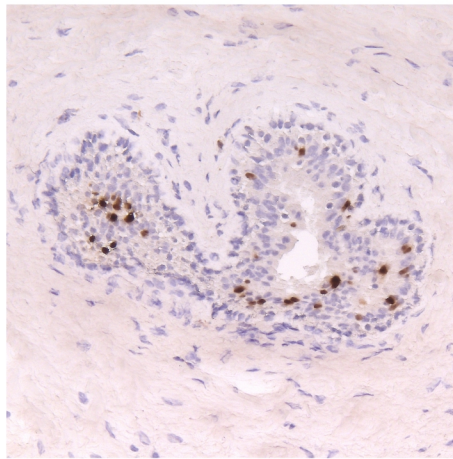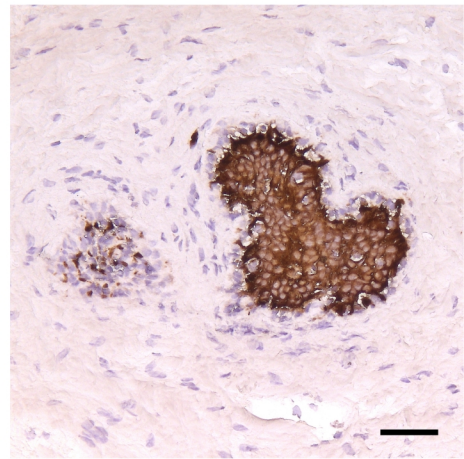

Supplement: DS_10.1369_0022155418788845.pdf [file DS_10.1369_0022155418788845.pdf]
